# Supplementary material for: Exploration of the binding modes of l-asparaginase complexed with its amino acid substrates by molecular docking, dynamics and simulation
Source: PubMed Central journal article supplement (PMC4835421; doi:10.1007/s13205-016-0422-x), 2016-04-18

## FT Site Prediction for ERWINAZE by FT Site

| Site 1 Residues | Site 2 Residues | Site 3 Residues |
|-----------------|-----------------|-----------------|
| ASP X 96        | ARG X 164       | ASP X 96        |
| GLU X 99        | TYR X 165       | THR X 97        |
| GLU X 100       | ILE X 166       | GLU X 99        |
| THR X 167       | THR X 167       | GLU X 100       |
| LYS X 168       | LYS X 178       | ALA X 301       |
| THR X 169       | ALA X 179       |                 |
| ASN X 170       | ASN X 180       |                 |
| ALA X 171       | GLU X 181       |                 |
| THR X 176       | GLU X 182       |                 |
| ASN X 180       | GLY X 280       |                 |
| ILE X 222       | ASN X 281       |                 |
| LEU X 223       | GLY X 282       |                 |
| TYR X 224       | SER X 297       |                 |
| ALA X 248       | LEU X 298       |                 |
| THR X 277       | ASN X 299       |                 |
| ARG X 278       | HIS X 302       |                 |
| THR X 279       |                 |                 |
| GLY X 280       |                 |                 |
| ASN X 281       |                 |                 |
| ASN X 299       |                 |                 |
| PRO X 300       |                 |                 |
| ALA X 301       |                 |                 |
| ARG X 304       |                 |                 |

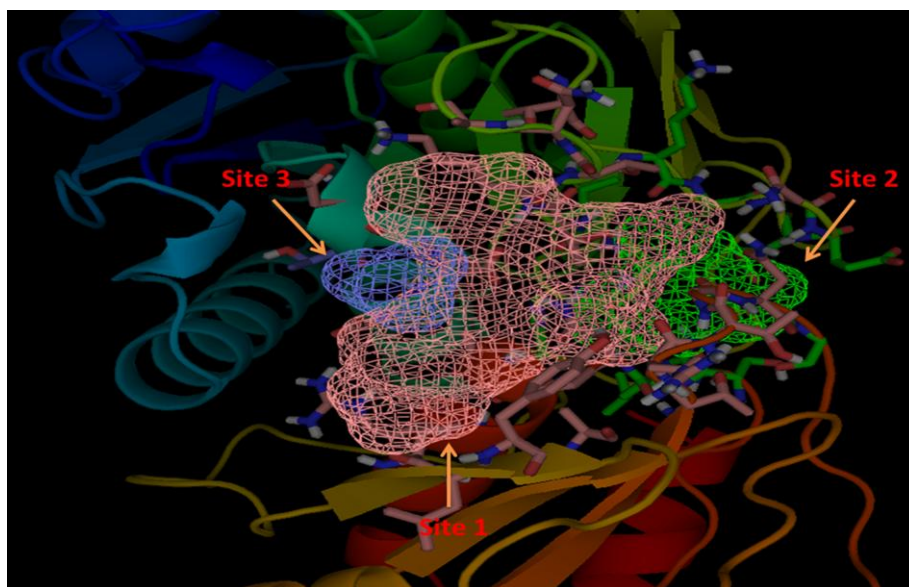

Supplement: 13205_2016_422_MOESM1_ESM.pdf [file 13205_2016_422_MOESM1_ESM.pdf]
